1  
2  
3  
4  
5  
6  
7  
8  
9  
10  
11  
12  
13  
14  
15  
16  
17  
18  
19  
20  
21  
22  
23  
24  
25  
26

**Sources and pathways by which low-grade inflammation contributes to anaemia in rural African children from 6 months to 3 years of age: study protocol for observational studies IDeA 1 and IDeA 2**

Elizabeth Ledger<sup>1</sup>, Hans Verhoef<sup>2</sup>, Amadou T Jallow<sup>1</sup>, Nicole Cunningham<sup>1,3</sup>, Andrew M. Prentice<sup>1</sup>, Carla Cerami<sup>1\*</sup>.

<sup>1</sup>Medical Research Council Unit The Gambia at the London School of Hygiene & Tropical Medicine, Atlantic Boulevard, Fajara, P.O. Box 273, Banjul, The Gambia

<sup>2</sup>Division of Human Nutrition and Health, Wageningen University, P.O. Box 17, 6700AA Wageningen, The Netherlands

<sup>3</sup>Department of International Health, Johns Hopkins Bloomberg School of Public Health, Baltimore, MD, USA (*current address*)

\*Corresponding author: Dr Carla Cerami, email: [ccerami@mrc.gm](mailto:ccerami@mrc.gm)

Authors emails:

Elizabeth Ledger ([elizabethledger@hotmail.com](mailto:elizabethledger@hotmail.com))

Hans Verhoef ([hans.verhoef@wur.nl](mailto:hans.verhoef@wur.nl))

Amadou Jallow ([atjallow@mrc.gm](mailto:atjallow@mrc.gm))

Nicole Cunningham ([ncunni11@jhmi.edu](mailto:ncunni11@jhmi.edu))

Andrew M. Prentice ([aprentice@mrc.gm](mailto:aprentice@mrc.gm))

Carla Cerami ([ccerami@mrc.gm](mailto:ccerami@mrc.gm))

**NOTE: This preprint reports new research that has not been certified by peer review and should not be used to guide clinical practice.**

27 **ABSTRACT**

28 **Background:** Recent work suggests that persistent inflammation, even at low levels, could be more  
29 important than low dietary iron intake in the aetiology of iron deficiency and iron deficiency  
30 anaemia (IDA) in young children living in poor environments.

31 **Methods:** We will conduct 2 parallel observational studies in well and unwell rural Gambian children  
32 to identify the origins of chronic low-grade inflammation and characterise its relationship to iron  
33 handling and iron deficiency anaemia. IDeA Study 1 will enrol 120 well children attending our regular  
34 paediatric well-child clinics at 6, 12 and 18 months of age. IDeA Study 2 will enrol 200 sick children  
35 suffering from upper-respiratory tract infection, lower respiratory tract infection, gastroenteritis or  
36 urinary tract infection and study them on Days 0, 3, 7 and 14 after initial presentation. At each visit,  
37 children will be assessed for signs of inflammation. Full blood count and iron-related biomarkers  
38 (serum ferritin, serum iron, unsaturated iron-binding capacity, soluble transferrin receptor,  
39 transferrin) will be measured before and after an oral dose of ferrous iron to assess status and acute  
40 iron absorption. Inflammatory markers (C-reactive protein and  $\alpha_1$ -acid glycoprotein), hepcidin,  
41 erythroferrone and erythropoietin will be measured to characterize the anaemia of inflammation in  
42 these children.

43  
44 **Conclusion:** We will assess the impact of acute and chronic low-grade inflammation on iron  
45 absorption and investigate the hypothesis that chronic inflammation, juxtaposed on a poor diet,  
46 causes a complex anaemia of inflammation which exacerbates iron deficiency by blocking both non-  
47 haem iron absorption and iron utilization by the bone marrow.

48 **KEYWORDS:** Anaemia, anaemia of inflammation, low-grade inflammation, iron, The Gambia,  
49 children, hepcidin, erythroferrone, erythropoietin, C-reactive protein

50 **Clinical trial registry:** ClinicalTrials.gov NCT04097639 and NCT04095884

51  
52 **Author approval:** All authors have read and approved this manuscript.

53

54

55

## 56 **BACKGROUND**

57 Iron deficiency (ID) is the most prevalent nutritional deficiency worldwide and, with its  
58 consequent iron deficiency anaemia (IDA), is most prevalent in Sub-Saharan Africa and South Asia  
59 [1]. The Global Burden of Disease estimates that 1.225 billion people suffer from IDA and the  
60 consequent years lived with disability (YLDs) outweigh all other nutritional deficiencies,  
61 haemoglobinopathies and haemolytic anaemias combined [1-2]. A 50% reduction in anaemia rates in  
62 women of reproductive age is one of WHO's 6 key Global Targets for 2025. However, it has been  
63 estimated that at current rates of progress this target will not be reached for 100 years. Similar  
64 challenges exist for the rates of anaemia in children.

### 65 **Effects of IDA**

66 Iron deficiency is a strong risk factor for adverse pregnancy outcomes including maternal  
67 mortality. During foetal and child development, iron is required for diverse aspects of neural  
68 formation, and deficiency is associated with delayed maturation of the brain and impaired cognition  
69 [3,4]. Importantly, deficits occurring in these early critical windows leave children with permanent  
70 damage that affects educational potential and hence human capital [5]. Iron deficiency may also  
71 impair immune responses, especially cellular immunity, and hence may limit the effectiveness of  
72 early childhood vaccines [6]. Interventions to correct ID face two interlocking challenges; potential  
73 hazard and lack of efficacy.

### 74 **Potential hazards of iron supplementation**

75 The possible hazards of iron administration in LMICs arise from the fact that iron stimulates  
76 the growth of many bacteria, protozoa and fungi [7]. Large epidemiological studies have shown that  
77 ID protects against malaria and several RCTs have shown that administration of iron can increase the  
78 risk of serious adverse outcomes in children (malaria, severe diarrhoea and respiratory tract  
79 infections) leading to excess hospitalisations and deaths [8]. We have recently described the most  
80 likely mechanism of how IDA protects against malaria, and how iron supplementation enhances the  
81 risk [9,10]. We have demonstrated how acute iron administration enhances bacterial growth rates  
82 [11,12]. These risks are driven at least in part by the use of non-physiological high doses of readily  
83 absorbable iron thought necessary to overcome the lack of efficacy.

### 84 **Efficacy of oral iron supplementation**

85 The limited efficacy of iron administration is a universal problem across all iron  
86 supplementation trials in LMICs and especially Africa. For example, we have recently completed 2  
87 trials in rural Gambia with 400 children aged 6-24m [13,14] and 500 second trimester pregnant  
88 women [12]. Despite administering iron for 12 weeks according to the WHO recommendations  
89 (12mg/d to children and 60mg/d to pregnant women) with an additional 15 micronutrients and with

90 all doses taken under direct supervision, 45% of women at delivery and 75% of the children  
91 remained anaemic [12,14]. Recent meta-analysis of 14 studies with 3011 patients found that iron  
92 supplementation reduced the risk of anemia (defined as Hb <110g/dl) by 45% and increased mean  
93 haemoglobin by 0.6g/l [15].

#### 94 **The role of hepcidin**

95 The discovery of the hormone hepcidin, a largely liver-derived peptide that acts as a master  
96 regulator of iron absorption and distribution, has yielded many new insights into the real-life biology  
97 of iron, iron-related infections and anemia [16]. Hepcidin is down regulated by iron deficiency and  
98 erythroid drive and up-regulated by iron sufficiency or overload and by inflammation [7,16].  
99 Hepcidin blocks iron absorption and recycling by down regulating ferroportin on the surface of  
100 enterocytes and macrophages. Conversely low levels of circulating hepcidin promote duodenal  
101 absorption of dietary iron, and permit rapid recycling of iron from aged or damaged erythrocytes.

#### 102 **Anaemia of inflammation**

103 In patients with autoimmune disease, renal disease and cancer there is a well described  
104 pathway to anaemia of inflammation where pro-inflammatory cytokines and upregulation of  
105 hepcidin lead to a reduction in red cell production [17]. Our recent work has shown that persistent  
106 inflammation (even at surprisingly low levels) could be more important than low dietary iron in the  
107 aetiology of ID and IDA [18]. In the HIGH study [13] hepcidin and haemoglobin were measured  
108 weekly and haematological, inflammatory and iron biomarkers were measured at baseline, 7 weeks  
109 and 12 weeks in 407 anaemic (Hb <11g/dl) but otherwise healthy Gambian children (6-27 months).  
110 Each child maintained a remarkably constant hepcidin level and half consistently maintained levels  
111 that indicated physiological blockade of iron absorption. Hepcidin was strongly predicted by nurse-  
112 ascribed adverse events with dominant signals from respiratory infections and fevers [18]. In  
113 multiple linear regression analysis, serum C-reactive protein (CRP) was the dominant predictor of  
114 hepcidin and contributed to iron blockade even at very low levels. It was concluded that even low-  
115 grade inflammation was an important driver of IDA in rural African children.

116 Previous work has shown that iron incorporation was lower on Day 0 in children presenting  
117 with acute febrile malaria and on Day 15 of convalescence than in Hb-matched children with iron  
118 deficiency alone [19]. Subsequent analysis of the same data set revealed that hepcidin concentration  
119 best predicted iron incorporation [20]. In a study in Tanzanian children, hepcidin concentrations  
120 normalized by 4 weeks after treatment for malaria [21] and a recent study in Uganda found that  
121 children recovering from malaria incorporated more iron if they were given iron supplements  
122 starting 28 days after treatment for malaria than if given immediately [22]. The impact of other

123 infections on iron absorption is unknown and requires clarity to guide clinical strategies for  
124 enhancing iron absorption.

125 We hypothesise that chronic inflammation (even at low levels), juxtaposed upon a poor diet,  
126 causes anaemia of inflammation [17] which, by diverse possible pathways, exacerbates iron  
127 deficiency by blocking both non-haem iron absorption and iron utilization by the bone marrow (see  
128 **Figure 1**).

129 In our prior study it was not possible to define the source(s) of the low-grade chronic  
130 inflammation because the children did not have detailed clinical examinations. The purpose of the  
131 current studies is to locate the origin(s) of inflammation in apparently well and sick children. In the  
132 cohort of well children their inflammation presumably arises from sub-clinical silent insults such as  
133 skin infections, poor oral hygiene, gum disease, dental caries or gastrointestinal enteropathy. The  
134 sick children will be recruited into 4 diagnostic categories representing the most common causes of  
135 fever in this setting (now that the incidence of malaria has declined substantially); upper respiratory  
136 tract infections (URTI), lower respiratory tract infections (LRTI), gastroenteritis and urinary tract  
137 infections

138

### 139 **Study objectives**

140 The overarching goal is to clarify the relationship between chronic low-grade inflammation  
141 and iron deficiency anaemia in rural African children. To this end the specific objectives are:

142

#### 143 **IDeA Study 1**

144 1) To confirm our prior observations that rural Gambian children frequently display persistent  
145 inflammatory-mediated raised levels of hepcidin and to assess changes from 6-18 months of  
146 age;

147 2) To seek to establish the likely source(s) of the persistent low-grade inflammation in  
148 apparently well children living in rural Gambia between the ages of 6-18 months of age.

#### 149 **IdeA Study 2**

150 1) To seek to establish the likely source(s) of inflammation in sick children presenting to our  
151 pediatric clinic in rural Gambia between 6-36 months of age with any of 4 diagnostic  
152 categories; upper respiratory tract infections (URTI), lower respiratory tract infections (LRTI),  
153 gastroenteritis or urinary tract infections (UTI).

154 Secondary objectives for both studies

- 155 1) To retest the existing hepcidin threshold of 5ng/ml (based on the Bachem ELISA; [23]) for  
156 discriminating iron absorbers from non-absorbers by repeating our prior ROC analysis based  
157 on a much larger sample;
- 158 2) To establish the role of inflammation in the relationship between erythropoietin  
159 concentration (EPO) and haematological concentration s;
- 160 3) To describe the interrelationships between serum markers of systemic inflammation  
161 (CRP/ $\alpha_1$ -acid glycoprotein, AGP) and their associations with serum concentrations of  
162 hepcidin and erythroferrone (ERFE);
- 163 4) To examine the influence of EPO on the association between haematological status and  
164 ERFE.

165

166 **Rationale supporting the secondary objectives**

167 Secondary objective 1: Using  $^{57}\text{Fe}/^{58}\text{Fe}$  tracer studies of dietary iron utilisation in rural Gambian  
168 children [18,19] we previously determined that a threshold level of hepcidin (at 5.5ng/ml using the  
169 BACHEM ELISA) distinguished good iron absorbers from poor iron absorbers [23]. Although the ROC  
170 AUC was high at 0.90 this analysis has two limitations: a) it was based on a very small sample; and b)  
171 half of the children were recovering from an acute episode of malaria. This analysis will now be  
172 repeated to validate (or adjust) the threshold based on a much larger sample size and data from well  
173 children. Importantly our new dataset will allow us to test whether the threshold varies by age,  
174 anaemia status and at different levels of inflammation. Note that the threshold can be adjusted for  
175 use with other hepcidin assays [24].

176 Secondary objective 2: We hypothesize that anaemic children with low-grade inflammation have an  
177 anaemia of inflammation with concomitant iron deficiency that results in inappropriately low levels  
178 of EPO production and reticulocytosis for their erythroid mass. Lack of responsiveness to EPO is an  
179 important component and has been previously described in acute and convalescent malaria in  
180 African children with high levels of inflammation [eg 25]. We will explore the relationship between  
181 persistent lower grade inflammation and the production of EPO in response to anaemia. We will  
182 achieve this by establishing the role of inflammation in the relationship between EPO and  
183 haemoglobin (as a measure of erythroid mass relative to total blood volume).

184 Secondary objectives 3 and 4: Erythroferrone is the recently-discovered hormone that mediates  
185 hepcidin suppression during stress erythropoiesis [26,27]. First, we will conduct a hypothesis-free  
186 exploratory analysis to assess whether ERFE behaves as predicted based upon mouse models (i.e. is

187 up-regulated by stress erythropoiesis and inversely related to hepcidin). As summarised in **Fig 1** we  
188 hypothesise that there may be a vicious cycle initiated by inflammation and then perpetuated by the  
189 consequent low levels of (iron-restricted) erythropoiesis, leading to low ERFE and loss of hepcidin  
190 suppression.

## 191 **SUBJECTS AND METHODS**

### 192 **Study setting**

193 MRC The Gambia Keneba field station is situated in rural West Africa where there are  
194 dramatic seasonal shifts from wet to dry seasons and where the majority of the population are  
195 subsistence farmers. The field station runs a well-accessed free primary health care facility and also  
196 is the home of the Keneba Biobank Project which contains blood samples from consenting  
197 individuals in 36 villages with 96% participation [28]. Analysis of over 4,000 samples from the  
198 biobank revealed a prevalence of anaemia (as per WHO definition haemoglobin less than 11g/dl) of  
199 91% in under-2 year olds and 71% in 2-3 year olds, with 78% of this anaemia (based on MCV cut off  
200 70 fL) derived from well-nourished African American children) caused by iron deficiency  
201 (unpublished analysis). Children from the 3 closest villages to the Keneba clinic (Keneba, Kantong  
202 Kunda and Manduar) will be recruited when they present for vitamin A supplementation and well-  
203 child check-up at 6 months of age, or when self-presenting with an acute infection.

### 204 **Recruitment and procedures for IDeA Study 1**

#### 205 **Study design**

206 This is a prospective cohort study of children who will enroll at the age of 6-8 months, with a follow-  
207 up period of one calendar year from recruitment onwards. A total of 120 well children will be  
208 recruited from weekly vaccination call clinics. After informed consent is obtained, children will have  
209 to meet the following inclusion/exclusion criteria to be enrolled.

210

#### 211 **Inclusion/exclusion criteria**

212 Children must be aged between 6-8 months at the time of study enrolment, residing in and  
213 intending to stay in the study site area and willing to adhere to all protocol visits and procedures,  
214 free from acute illness, with a normal temperature (<37.5 degrees Celsius), with no vaccinations in  
215 the last 7 days prior to study enrolment, with no recent administration of immune-suppressants or  
216 other immune-modifying agents within 90 days prior to study, with no administration of systemic  
217 antibiotic treatment within 3 days prior to study enrolment, with no history of, or evidence for,  
218 chronic clinically significant disorder or disease, with no history of maternal infections by human

219 immunodeficiency virus, chronic hepatitis B or chronic hepatitis C, and not participating in another  
220 study.

221 A field worker will be responsible for maintaining links with participants between follow up  
222 visits and arranging transport to and from the study site. Scheduling will be arranged through the  
223 REDCap software system (REDCap; <https://projectredcap.org>).

#### 224 **Participant flow**

225 We expect to enrol 10 participants per month over one calendar year so that the target  
226 sample size (120 children) will be attained in one year. Each participant will be seen three times, at  
227 times when they would usually present to clinic as part of The Gambia EPI schedule: 6 months, 12  
228 months (Diphtheria, Pertussis and Tetanus boosters) and 18 months (Polio, Measles and Rubella  
229 boosters). All patients will be seen and take part in the iron absorption test before receiving routine  
230 immunisation.

#### 231 **Clinical assessment**

232 At each visit, children will be examined by the research clinician using pre-determined  
233 checklists for possible sources of low-grade inflammation (**Tables 1**).

234 A clinical score has been devised based on a number of clinical severity scores for certain  
235 minor illnesses of childhood and takes into account severity of symptom/condition and the number  
236 of anatomical sites affected. Sources of inflammation and infection will be searched for in the ears,  
237 nose and throat, the respiratory system, the skin and all skin flexures, the oral cavity including  
238 dentition, evidence of lymphadenopathy, signs of infection/inflammation in the orbital region and  
239 any evidence of injury or trauma. Severity is graded as 0- normal/no inflammation; 1- mild  
240 inflammation; 2- moderate inflammation; 3- severe inflammation. Existing validated clinical scores  
241 developed to guide management and treatment were used and adapted for diagnoses of otitis  
242 externa [29], otitis media [30], lower respiratory tract infections [31], and atopic dermatitis [32].  
243 Where clinical scores do not exist, divisions of severity will be made based on clinical findings such as  
244 number of lesions or extent of erythema. The number of anatomical locations and severity of the  
245 signs found is added together to give a numerical score with a range 0-81 (severe inflammation at 27  
246 possible anatomical sites).

247 Skin conditions, poor oral health, and respiratory infections/airway disease are very common  
248 in children in West Kiang, particularly in the rainy season, but are not usually considered serious  
249 enough by the parents to bring the child to clinic. Possible skin sources of inflammation include  
250 eczema, impetigo, folliculitis, and fungal infections such as tinea capitis will be noted if present.



251 Although gingivitis and dental caries are rare in UK children of this age, poor oral hygiene in the  
252 Gambian population is a potential source of inflammation [33,34].

## 253 **Recruitment and procedures for IDeA Study 2**

### 254 **Study design**

255 In total, 200 sick children aged between 6-36 months will be recruited from the clinic.  
256 Successive children brought by their mothers to the clinic will be recruited into 4 diagnostic  
257 categories; upper respiratory tract infections, lower respiratory tract infections, gastroenteritis and  
258 urinary tract infections. These reflect the commonest causes of fever in this age range [35,36]. Fever  
259 is the commonest presenting complaint to the Keneba clinic in this age range. Each participant will  
260 be seen 4 times: Days 0, 3, 7 and 14 after initial presentation. After informed consent is obtained,  
261 children will have to meet the following inclusion/exclusion criteria to be enrolled into the study.

### 262 **Inclusion/exclusion criteria**

263 For inclusion, children must be aged between 6-36 months at the time of study enrolment,  
264 residing in and intending to stay in the study site area and willing to adhere to all protocol visits and  
265 procedures, with a fever (>37.5C) and/or signs of acute illness, with no vaccinations in the last 7 days  
266 prior to study enrolment, with no recent administration of immune-suppressants or other immune-  
267 modifying agents within 90 days prior to study, with no administration of systemic antibiotic  
268 treatment within 3 days prior to study enrolment, with no history of or evidence for chronic clinically  
269 significant disorder or disease, with no maternal history of human immunodeficiency virus, chronic  
270 hepatitis B or chronic hepatitis C infections, and not participating in another study.

271 In addition to this they must fall into one of the four following diagnostic categories as defined  
272 below.

### 273 **Urinary tract infection (UTI) [37]**

274 Inclusion criteria (one from the list below):

- 275 1. Positive leucocytes, positive nitrites on dipstick
- 276 2. Negative leucocytes, positive nitrites on dipstick
- 277 3. Positive leucocytes, negative nitrites, plus bacteriuria on microscopy
- 278 4. Positive leukocytes, negative nitrites plus no bacteriuria, only pyuria on microscopy PLUS  
279 clinical features e.g. fever, pain on urination, offensive smelling urine.

### 280 **Lower respiratory tract infections (LRTI) [38]**

281 Inclusion criteria (one from the list below):

- 282 1. Focal signs on auscultation of the chest i.e. crepitations/ wheeze/ reduced air entry

283 2. Fever > 38.5C AND chest recessions AND/OR respiratory rate over 40 breaths/minute

284 3. Radiological evidence of LRTI

285 Exclusion criteria:

286 1. Positive malaria test OR suspicion of metabolic acidosis causing tachypnoea and fever

287 **Upper respiratory tract infection (URTI) [39]**

288 Inclusion criteria (one from the list below):

289 1. Evidence of nasal discharge AND/OR

290 2. Inflammation throat/ tonsils on direct examination AND/OR

291 3. Inflammation of middle or outer ear on direct examination

292 4. History of fever AND history of stridor/ barking cough

293 5. History of fever AND lymphadenopathy AND/ OR URTI symptoms i.e. sore throat/cough

294 Exclusion criteria (one from the list below):

295 1. Foreign body inserted in either nose/ ear

296 2. Traumatic perforation of ear drum

297 3. Allergic rhinitis i.e. good contact history

298 4. Evidence of LRTI

299 **Diarrhoea/gastroenteritis [39]**

300 Inclusion criteria (one from the list below):

301 1. Abrupt onset of 3 or more loose/liquid stools/ day

302 2. Ova, cysts, parasites identified on stool microscopy PLUS (diarrhoea or fever or vomiting)

303 3. Fever AND vomiting WITHOUT other cause of fever i.e. UTI/LRTI/URTI

304 Exclusion criteria (one from the list below):

305 1. Neurological cause of vomiting

306 ***Withdrawal of participants***

307 In case the participant decides to withdraw during either study, the participant's samples will not be

308 worked on, but any information previously generated from the samples before the time of

309 withdrawal will be used.

310 **Oral iron absorption test**

311 After the clinical examination, an oral iron absorption protocol will be initiated in all children:

312 Step 1: A baseline venous blood sample will be collected for later assay of full blood count (including  
313 reticulocyte count) and serum iron markers, hepcidin, erythropoietin (EPO), erythroferrone, IL-6 and  
314 EndoCab;

315 Step 2: Children will be given an oral dose of liquid ferrous fumarate at 2mg/kg;

316 Step 3: 4 hours later a venous blood sample will be drawn for measurement serum iron markers. The  
317 change in serum iron levels (measured before and after dosing) will be used as a direct  
318 measurement of iron absorption.

### 319 **Laboratory analysis**

320 Whole blood samples will be assessed for: full haematology panel (using a Medonic M20M GP  
321 or Cell Dyne Ruby). All serum samples collected will be assessed for the following: hepcidin,  
322 erythropoietin, erythroferrone all by ELISA. Additionally, serum ferritin, serum iron, unsaturated  
323 iron-binding capacity (UIBC), soluble transferrin receptor (sTfR), transferrin, C-reactive protein (CRP),  
324 and alpha 1-acid glycoprotein (AGP) will be assessed using a fully automated biochemistry analyser  
325 (Cobas Integra 400 plus).

326 A stool sample will be collected to check for presence and severity of helminth infection and  
327 analysed for fecal calprotectin as a marker of gut inflammation or environmental enteric dysfunction  
328 (EED).

### 329 **Data entry, handling, storage and security:**

330 All protocol-required field data will be captured electronically on an electronic Case Report  
331 Form (eCRF). Data will be entered in real time using eCRFs developed in a REDCap (Research  
332 Electronic Data Capture) database. Entered data will be acquired by the database via a direct secure  
333 connection over the 4G mobile network. Laboratory related data will be extracted directly from  
334 laboratory equipment, where functionality is available and uploaded to the database. Otherwise,  
335 results will be captured using a custom designed laboratory results form. Any data collected on the  
336 paper format will be double entered by a trained data entry clerk.

337 After giving written consent, the children will be given a study identification number, which  
338 will be used in all future datasets for subject anonymity. Any and all paper/electronic forms will be  
339 checked and any errors will be identified prior to marking data as complete. Electronic data will be  
340 stored on the local dedicated server maintained at MRCG. The study will be conducted in  
341 compliance with Good Clinical Practice. Study personal security measures will include controlled  
342 access limited to authorised users only, physical security, removal of identifiable information

343 (anonymization) prior to any data sharing, avoidance of third-party cloud storage and password  
344 protection.

### 345 **Sample size calculation**

346 The primary objective is a descriptive study. No sample size calculation was conducted.

### 347 **Statistical analysis:**

#### 348 **Primary objective:**

349 The primary objective of this study is to determine the sources of low-grade inflammation in  
350 otherwise-well children between the ages of 6-24 months living in rural Gambia.

#### 351 **Analysis plan:**

352 Multiple regression analysis will be used to model inflammatory markers (serum  
353 concentrations of CRP and AGP) as a function of clinical scores for skin infections, oral health and  
354 respiratory infections; and stool markers of inflammation (fecal calprotectin). In these analyses, we  
355 will account for child age as a potential confounder, and we will account for multiple assessments  
356 for each child.

#### 357 **Secondary objective 1:**

358 To retest the hypothesis that falling hepcidin concentrations predict a rise in serum iron absorption  
359 in a much larger sample size.

#### 360 **Analysis plan:**

361 Multiple regression analysis will be used to model iron absorption (serum iron concentration  
362 at 3h after oral administration of the iron supplement) as a function of hepcidin concentration.  
363 Because we expect the serum iron response to strongly depend on serum iron concentration before  
364 administration of the iron dose), we will include initial serum iron concentration as a covariate in the  
365 model (both as main term and its product term with hepcidin concentration). We will also assess the  
366 role of other potential effect modifiers (age, anaemia, CRP, AGP, sTfR, MCV, EPO and  
367 erythroferrone), each in separate models, using a backwards elimination process.

#### 368 **Secondary objective 2:**

369 To establish the role of inflammation in the relationship between EPO and haematocrit to test  
370 for decreased EPO synthesis and/or increased EPO resistance in anaemic children with low-grade  
371 inflammation.

372 **Analysis plan:**

373 In the absence of anaemia, EPO concentrations are low (approximately 10U/L) and  
374 independent of haemoglobin concentration, consistent with our biological understanding that EPO is  
375 produced only in response to hypoxic stress. In anaemia, however, EPO production may increase by  
376 a factor of up to 1000, with the increase in log EPO being linearly associated with haemoglobin  
377 concentration (or its proxy, haematocrit values). The slope of the regression line between log EPO  
378 and haemoglobin concentration is reduced in patients with inflammation compared to their peers  
379 with moderate to severe deficit of functional iron. In iron deficiency without inflammation, it is  
380 believed that there are no restrictions in EPO production other than its response to hypoxia.  
381 Together, this evidence indicates that, in inflammation, the EPO response is inappropriately low for  
382 the degree of anaemia.

383 The challenge in our analysis will be to similarly show the influence of inflammation (indicated  
384 by serum concentrations of CRP or AGP) on the association between EPO and haemoglobin  
385 concentration. Because the degree of inflammation is expected to be lower than in the patients  
386 studied in previously published reports, and because haemoglobin concentration is expected to be  
387 higher, we expect much smaller effects.

388 We will assess influences on EPO using fractional polynomial regression models with CRP and  
389 AGP (continuous variables) and haemoglobin concentration (continuous variable centred at 110g/L),  
390 as well as their product terms, whilst accounting for dependency of observations within persons and  
391 potential heteroscedasticity:

$$\begin{aligned} 392 \quad \ln \hat{EPO} = & \beta_0 + \beta_1 \cdot (Hb - 110) + \beta_2 \cdot CRP + \beta_3 \cdot AGP + \beta_4 \cdot [(Hb - 110) \cdot CRP] + \beta_5 \\ 393 & \cdot [(Hb - 110) \cdot AGP] \end{aligned}$$

394 where Hb indicates haemoglobin concentration in g/L. Analysis will be restricted to individuals with  
395 anaemia (haemoglobin concentration  $\leq 110$ g/L). We expect to be able to eliminate the main terms  
396 for CRP and AGP from this model, under the assumptions that inflammation does not lead to a  
397 reduction in EPO concentration unless it is accompanied by a reduction in haemoglobin  
398 concentration below 110g/L, and that inflammation is adequately and entirely represented by CRP  
399 and AGP. In such conditions, inflammation will influence the slope of the line between log EPO and  
400 haemoglobin concentration, but not its intercept (i.e., at haemoglobin concentrations of 110g/L, our  
401 model above will reduce to a single expected value:  $\hat{EPO} = e^{\beta_0}$ ). Thus, our model is parametrised to  
402 allow evaluation of our hypothesis that inflammation reduces EPO response to haemoglobin  
403 concentration ( $\beta_4$  and  $\beta_5$  are both below zero).

404 In an analysis of all data combined, the potential effect modification by CRP (and alternate  
405 measures of iron status and inflammation including hepcidin) will be assessed using forward  
406 selection to determine the variables for inclusion in multivariate analysis of factors predicting the  
407 slope and intercept of the EPO/Hb relationship. We will also calculate the Reticulocyte Production  
408 Index (RPI) =  $(\text{Hct}/45) * \text{Retic}/\text{Maturation}$ . An RPI >3 shows a normal marrow response to anemia.  
409 An RPI <2 is an inadequate response to anemia and is consistent with a diagnosis of AI. Additionally,  
410 because serum sTfR levels are the product of cellular receptor density (and are up-regulated by iron  
411 demand) and cell numbers (primarily deemed to reflect erythroblasts) we will conduct an  
412 exploratory analysis of the inter-relationships between EPO, sTfR and reticulocyte number.  
413

#### 414 **Secondary objectives 3 and 4:**

415 To describe the interrelationships between: a) systemic inflammation (CRP/AGP) and its  
416 associations with hepcidin and ERFE, and b) the influence of EPO on the association between Hb and  
417 ERFE.

#### 418 **Analysis plan:**

419 We will conduct a hypothesis-free exploratory analysis to assess whether ERFE behaves as  
420 predicted based by mouse models (ie up-regulated by stress erythropoiesis and inversely related to  
421 hepcidin). Our first task will be to map and explore the inter-relationships between ERFE and the  
422 erythroid drive (reticulocytes, sTfR and EPO) and to examine whether there is evidence that ERFE is  
423 significantly modulating hepcidin. This will require multiple regression modelling and pathways  
424 analysis that include the competing stimuli for which prior analysis suggest that UIBC and MCV will  
425 be the best indices of iron status and CRP/AGP and granulocyte counts the best indices of  
426 infection/inflammation. Depending upon the outcomes of these exploratory analyses we may be  
427 able to test our hypothesis that the high levels of hepcidin so common in Gambian children are  
428 driven in part by suppressed ERFE.

#### 429 **Confounding, bias and loss to follow up**

430 The study design does not provide for the recruitment of equal numbers of subjects in each  
431 month of the year (or during the dry vs wet seasons). If we are missing data for the covariates, for  
432 the secondary analysis, we will use pairwise deletion and consider multiple imputation if there are  
433 missing covariates in more than 5% of participants and data can be assumed to be missing at  
434 random. If loss to follow-up rate is considerably different between groups, we will perform  
435 sensitivity analyses to examine the robustness of results.

436

437 **DISCUSSION**

438 Iron deficiency and iron deficiency anaemia remain significant public health concerns in children in  
439 The Gambia and similar LMICs. Programmes to combat iron deficiency are frequently unsuccessful  
440 due to poor efficacy of oral iron supplementation and potential hazards in certain circumstances. We  
441 have previously shown that the low-grade inflammation frequently found in children living in  
442 unsanitary environments can result in hepcidin-mediated blockade of iron absorption. This project  
443 will try to identify the sources of this low-grade inflammation in seemingly 'well' Gambian children  
444 and assess its severity in unwell children. It will additionally try to understand the complex  
445 interacting mechanisms linking inflammation, hepcidin, EPO and ERFE to iron absorption,  
446 distribution and erythropoiesis. If, as we speculate, the origins of IDA are more strongly determined  
447 by inflammation than by low dietary iron this would have important implications for future clinical  
448 interventions as well as agricultural and livestock policies.

449

450

451

452

## 453 **Abbreviations**

454 AGP: alpha-1-acid-glycoprotein; CRP: C-reactive protein; ELISA: enzyme-linked immunosorbent  
455 assay; EndoCAB: serum endotoxin core antibody; EPO: erythropoietin; ERF: erythroferrone; Hb:  
456 haemoglobin; ID: iron deficiency; IDA: iron deficiency anaemia; iFABP: enterocyte fatty acid binding  
457 protein; IL-6; interleukin 6; IRIDA; iron refractory iron deficiency anaemia; LMIC: lower middle  
458 income country; MCV: mean cell volume; REG1b: regenerating protein 1 beta; RPI: reticulocyte  
459 production index; ROC AUC: area under the receiver operating characteristic curve; sTfR: soluble  
460 transferrin receptor; UIBC: unsaturated iron-binding capacity; WHO: World Health Organisation.

## 461 **Acknowledgments**

462 We thank the Dr Fatai Akemokwe and Edrisa Sinjanka for their guidance and enthusiasm during the  
463 planning this study.

## 464 **Funding**

465 This research is undertaken with a research grant provided by the Medical Research Council  
466 (MR/R023360/1) with additional core funding to the MRC Unit The Gambia @ LSHTM from the UK  
467 Medical Research Council (MRC) and the UK Department for International Development (DFID)  
468 under the MRC/DFID Concordat agreement. The funding agencies had no role in the design and  
469 conduct of the study, and will not have any role in the collection, management, analyses or  
470 interpretation of the data nor in the preparation, review, or approval of the manuscript.

## 471 **Availability of data and materials:**

472 All data will be made available to researchers upon reasonable request to the study PI and clearance  
473 by the MRCG Scientific Coordinating and Ethics Committees.

## 474 **Authors contributions**

475 AMP and CC conceived the study. EL and CC designed the clinical study protocol. EL, CC, ATJ  
476 developed the laboratory protocols. HV wrote the data analysis plan in consultation with CC and  
477 AMP. EL, NC, CC and AMP drafted the manuscript. All authors approved the manuscript.

## 479 **Ethics approval and consent to participate**

480 These studies have been approved by The Gambia Government/MRC Joint Ethics Committee (LEO  
481 1664 and 17079). The study procedures will be explained to the children's mothers/guardians orally



482 with a witness present if they are illiterate or in writing. A child will be recruited into the study after  
483 the consent form has been signed/thumb printed by the mother/guardian.

484

485 ***Future use of stored specimens***

486 The blood and faecal samples collected during the trial may be used to support other research in the  
487 future, and may be shared anonymously with other researchers, for their ethically approved  
488 projects. Any future use would require approvals from the principal investigator, MRCG@LSHTM  
489 Scientific Coordinating Committee, and the Gambian Government MRCG Joint Ethics Committee.  
490 Informed consent from the parents/guardians for this will be included within the informed consent  
491 documents.

492 ***Participant confidentiality***

493 Any identifiable data collected will be stored securely and their confidentiality protected in  
494 accordance with the UK General Data Protection Regulation (UK GDPR) and the Data Protection Act  
495 (2018). All data will be anonymised, and individuals will not be identifiable.

496 ***Dissemination and data availability***

497 All key findings from this study will be submitted for publication in peer-reviewed journals. Any  
498 request for use of study data will go through approval from the Scientific Coordinating Committee at  
499 MRC Unit The Gambian and the Gambian Government MRCG Joint Ethics Committee. All data will be  
500 in an anonymous format for external users.

501 **Consent for publication:**

502 Not applicable.

503

504 **Competing interests:**

505 The authors declare that they have no competing interests.

506

## 507 **References**

- 508 1. James SL et al. Global, regional, and national incidence, prevalence, and years lived with  
509 disability for 354 diseases and injuries for 195 countries and territories, 1990–2017: a  
510 systematic analysis for the Global Burden of Disease Study 2017. *The Lancet*. 2018;392:1789-  
511 1858.
- 512 2. Hess SY, McLain AC, Frongillo EA, Afshin A, Kassebaum NJ, Osendarp SJM, Atkin R, Rawat R,  
513 Brown KH. Challenges for Estimating the Global Prevalence of  
514 Micronutrient Deficiencies and Related Disease Burden: A Case Study of  
515 the Global Burden of Disease Study. *Curr Dev Nutr*. 2021;5:nzab141.
- 516 3. Cusick SE & Georgieff MK. The Role of Nutrition in Brain Development: The Golden  
517 Opportunity of the “First 1000 Days.” *J Pediatr*. 2016;175:16-21.
- 518 4. Georgieff MK, Ramel SE, Cusick SE. Nutritional influences on brain development. *Acta*  
519 *Paediatr*. 2018;107:1310-1321.
- 520 5. Horton S, & Ross J. The economics of iron deficiency. *Food Policy*. 2003;28:51-75.
- 521 6. Drakesmith H, et al. Vaccine efficacy and iron deficiency: an intertwined pair? *Lancet*  
522 *Haematol*. 2021;8:e666-e669.
- 523 7. Drakesmith H & Prentice AM. Hepcidin and the iron-infection axis. *Science*. 2012;338:768-  
524 72.
- 525 8. Prentice AM, Mendoza YA, Pereira D, Cerami C, Wegmüller R, Constable A & Spieldenner J.  
526 Dietary strategies for improving iron status: Balancing safety and efficacy. *Nutrition*  
527 2017;75:49-60.
- 528 9. Clark MA et al. Host iron status and iron supplementation mediate susceptibility to  
529 erythrocytic stage plasmodium falciparum. *Nat Comms*. 2014;5:4446
- 530 10. Goheen MM, et al. Anemia Offers Stronger Protection Than Sickle Cell Trait Against the  
531 Erythrocytic Stage of Falciparum Malaria and This Protection Is Reversed by Iron  
532 Supplementation. *EBioMedicine*. 2016;14:123-130
- 533 11. Cross JH, Bradbury RS, Fulford AJ, Jallow AT, Wegmüller R, Prentice AM & Cerami C. Oral iron  
534 acutely elevates bacterial growth in human serum. *Scientific Reports*. 2015;5:16670
- 535 12. Bah A, et al. Hepcidin-guided screen-and-treat interventions against iron-deficiency anaemia  
536 in pregnancy: a randomised controlled trial in The Gambia. *Lancet Glob Health*.  
537 2019;7:e1564-e1574.
- 538 13. Wegmüller R et al. Efficacy and safety of hepcidin-based screen-and-treat approaches using  
539 two different doses versus a standard universal approach of iron supplementation in young  
540 children in rural Gambia: A double-blind randomised controlled trial. *BMC Pediatrics*.

- 541 2016;16:149.
- 542 14. Wegmüller R, Bah A, Kendall L, Goheen MM, Sanyang S, Danso E, Sise EA, Jallow A, Verhoef  
543 H, Jallow MW, Wathuo M, Armitage AE, Drakesmith H, Pasricha SR, Cross JH, Cerami C,  
544 Prentice AM. Hepcidin-guided screen-and-treat interventions for young children with iron-  
545 deficiency anaemia in The Gambia: an individually randomised, three-arm, double-blind,  
546 controlled, proof-of-concept, non-inferiority trial. *Lancet Glob Health*. 2023;11:e105-e116.
- 547 15. Tam E, Keats EC, Rind F, Das JK, Bhutta AZA. Micronutrient Supplementation and  
548 Fortification Interventions on Health and Development Outcomes among Children Under-  
549 Five in Low- and Middle-Income Countries: A Systematic Review and Meta-Analysis.  
550 *Nutrients*. 2020;12:289.
- 551 16. Ganz T. Systemic iron homeostasis. *Physiol Rev*. 2013;93:1721-41.
- 552 17. Weiss G, Ganz T, Goodnough LT. Anemia of inflammation. *Blood*. 2019;3:133:40-50.
- 553 18. Prentice AM et al. Respiratory infections drive hepcidin-mediated blockade of iron  
554 absorption leading to iron deficiency anemia in African children. *Science Advances*.  
555 2019;5:eaav9020
- 556 19. Doherty CP, Cox SE, Fulford AJ, Austin S, Hilmers DC, Abrams SA, Prentice AM.  
557 Iron incorporation and post-malaria anaemia. *PLoS One*. 2008;3:e2133.
- 558 20. Prentice AM, et al. Hepcidin is the major predictor of erythrocyte iron incorporation in  
559 anemic African children. *Blood*. 2012;119:1922-8.
- 560 21. de Mast Q, et al. Assessment of urinary concentrations of hepcidin provides novel insight  
561 into disturbances in iron homeostasis during malarial infection. *J Infect Dis*. 2009;199:253-  
562 62.
- 563 22. Cusick SE, Opoka RO, Abrams SA, John CC, Georgieff MK, Mupere E. Delaying Iron Therapy  
564 until 28 Days after Antimalarial Treatment Is Associated with Greater Iron Incorporation and  
565 Equivalent Hematologic Recovery after 56 Days in Children: A Randomized Controlled Trial. *J*  
566 *Nutr*. 2016;146:1769-74.
- 567 23. Pasricha SR et al. Expression of the iron hormone hepcidin distinguishes different types of  
568 anemia in African children. *Sci Trans Med*. 2014;6:235re3.
- 569 24. van der Vorm LN et al. Toward worldwide hepcidin assay harmonization: Identification of a  
570 commutable secondary reference material. *Clin Chem*. 2016;62:993-1001.
- 571 25. Kurtzhals JA, Rodrigues O, Addae M, Commey JO, Nkrumah FK, et al. Reversible suppression  
572 of bone marrow response to erythropoietin in *Plasmodium falciparum* malaria. *Br J*  
573 *Haematol* 1997;97:169–174.

- 574 26. Kautz L, Jung G, Valore EV, Rivella S, Nemeth E & Ganz T. Identification of erythroferrone as  
575 an erythroid regulator of iron metabolism. *Nat Genet.* 2014;46:678-84
- 576 27. Pasricha S-R, McHugh K & Drakesmith H. Regulation of Hepcidin by Erythropoiesis: The Story  
577 So Far. *Ann Rev Nutr.* 2016;36:417-34
- 578 28. Hennig BJ, et al. Cohort Profile: The Kiang West Longitudinal Population Study (KWLPs)-a  
579 platform for integrated research and health care provision in rural Gambia. *Int J Epidemiol.*  
580 2012;46:e13
- 581 29. Hajioff D & Mackeith S. Otitis externa. *BMJ Clin Evid.* 2015;2015:0510
- 582 30. Casey JR, Block S, Puthoor P, Hedrick J, Almudevar A & Pichichero ME. A simple scoring  
583 system to improve clinical assessment of acute otitis media. *Clin Ped.* 2011;50:623-9.
- 584 31. Rodriguez H, Hartert TV, Gebretsadik T, Carroll KN & Larkin EK. A simple respiratory severity  
585 score that may be used in evaluation of acute respiratory infection Pediatrics. *BMC Research*  
586 *Notes.* 2016;9:85.
- 587 32. Wolkerstorfer A, De Waard van der Spek FB, Glazenburg EJ, Mulder PGH & Oranje AP.  
588 Scoring the severity of atopic dermatitis: Three item severity score as a rough system for  
589 daily practice and as a pre-screening tool for studies. *Acta Dermato-Venereologica.*  
590 1999;79:356-9.
- 591 33. Gordon N. Oral health care for children attending a malnutrition clinic in South Africa. *Int J*  
592 *Dent Hyg.* 2007;5:180-6
- 593 34. Lamb WH & Prentice AM. A prospective survey of gingivitis in Keneba, a rural West African  
594 community. *Annals of Tropical Paediatrics.* 1983;3:137-42.
- 595 35. D'Acromont V *et al.* Beyond malaria - Causes of fever in outpatient Tanzanian children. *New*  
596 *Engl J Med* 2014;370:809-17.
- 597 36. Davis T. NICE guideline: Feverish illness in children - Assessment and initial management in  
598 children younger than 5 years. *Arch Dis Childh: Educ Pract Ed.* 2013;98:232-5.
- 599 37. NICE. (NICE) Urinary tract infection in under 16s Diagnosis and management. *National*  
600 *Institute for Health and Care Excellence* (2007).
- 601 38. Harris M *et al.* British Thoracic Society guidelines for the management of community  
602 acquired pneumonia in children: Update 2011. *Thorax* 2011;66 Suppl 2:ii1-23
- 603 39. World Health Organization. Guideline: Updates on Paediatric Emergency Triage, Assessment  
604 and Treatment: Care of Critically-Ill Children. *Guideline: Updates on Paediatric Emergency*  
605 *Triage, Assessment and Treatment: Care of Critically-Ill Children* (2016).
- 606  
607  
608

609

610 **Figure 1: Pathways by which inflammation in young children contributes to an anaemia of**  
611 **inflammation**

612

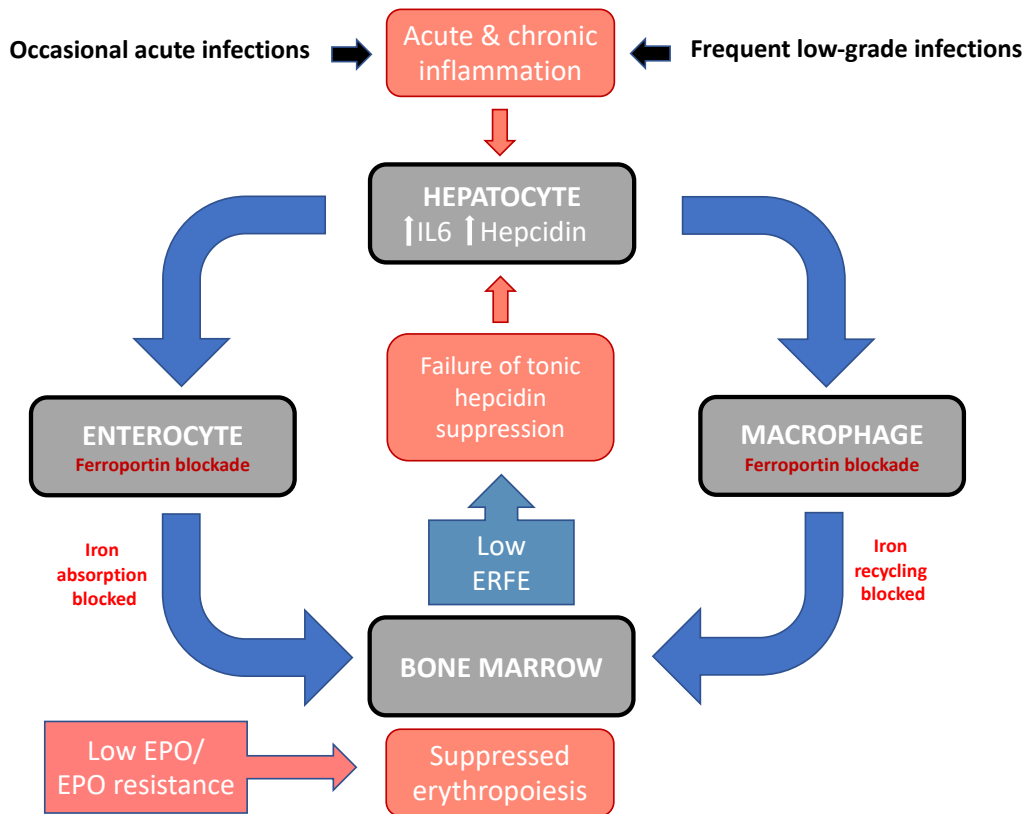

613

614 IL-6, interleukin-6 (and related inflammatory signals); ERFE, erythroferrone; EPO, erythropoietin

615

616

617 **Table 1: Clinical Score of Site and Severity of Infection and Inflammation (CSSSII)**

| System                 | Sign/Diagnosis                         | Site                       | Severity score<br>Normal (0), mild (1), moderate (2), severe (3)                                                                                                                                                                                                                                                                        |
|------------------------|----------------------------------------|----------------------------|-----------------------------------------------------------------------------------------------------------------------------------------------------------------------------------------------------------------------------------------------------------------------------------------------------------------------------------------|
| <b>Lymphadenopathy</b> |                                        | Neck, axilla, groin, other | 0 None (0); 1 1 node < 1cm, rubbery (1); 1-3 nodes, rubbery (2); > 3 nodes, any node > 1cm, any node hard or evidence of suprainfection (3).                                                                                                                                                                                            |
| <b>Ears</b>            | Otitis externa                         | Right, left                | Normal (0); TM seen, canal erythematous (1); Oedematous canal, debris in canal, TM obscured (2) Fever, oedematous ear canal, cellulitis of pinna (3)                                                                                                                                                                                    |
|                        | Otitis media                           | Right, left                | Normal (0); Retracted/neutral position of TM, mild erythema (1), Moderate TM erythema, TM mobility decreased (2), Full, bulging TM, otorrhoea, severe TM erythema, TM mobility absent (3)                                                                                                                                               |
| <b>Nose</b>            | Discharge                              |                            | None (0); Clear (1); Purulent (2); Profuse, purulent and/ or bloody (3)                                                                                                                                                                                                                                                                 |
| <b>Throat</b>          |                                        | Right, left                | Normal (0); Mild Inflammation (1); Inflammation and exudate (2); Severe inflammation and swelling exudate/pus/abscess (3)                                                                                                                                                                                                               |
| <b>Respiratory</b>     | Presence of interval symptoms (asthma) |                            | No interval symptoms (0); Night time cough, shortness of breath on exertion, or family history, or previous use of inhaler (1); Diagnosed asthma and regular use of inhaler (2) Use of inhalers every day/ active Use of inhalers every day/ active flare up currently                                                                  |
|                        | Oxygen saturations                     |                            | 0 >95% (0); 94-95% (1); 90-93% (2); < 90% (3)                                                                                                                                                                                                                                                                                           |
|                        | Tachypnea                              |                            | None (0); Mild intercostal retractions (1); Moderate intercostal retractions (2); Severe, head bobbing, tracheal tugging (3)                                                                                                                                                                                                            |
|                        | Auscultation                           |                            | No added sounds (0) End expiratory wheeze/ creps only (1) Few scattered/ focal crepitations. Focal reduced air entry (2); Coarse crepitations throughout both lung fields, reduced air entry throughout both lung fields (3)                                                                                                            |
| <b>Skin</b>            | Scabies                                |                            | None (0); < 10 lesions (1); 11-49 lesions (2); > 50 lesions or crusted scabies (3)                                                                                                                                                                                                                                                      |
|                        | Impetigo                               |                            | None (0)<br>1 1-10 lesions (1)<br>2 11-49 lesions (2)<br>3 > 50 lesions or associated with any systemic symptoms (fever, vomiting, rigors) (3)                                                                                                                                                                                          |
|                        | Atopic dermatitis                      |                            | None (0); Less 5% BSA involved, no acute changes, no significant impact on quality of life (1); 5-30% BSA involved, mild dermatitis with acute changes, mild dermatitis with significant impact on Quality of Life (QoL) (2) >30% BSA, Mod dermatitis with acute changes, Mod dermatitis with significant impact on Quality of Life (3) |
|                        | Oral thrush                            |                            | None (0); White coated tongue, mouth (1); Red painful to eat/swallow (2); Evidence of oesophageal involvement (3)                                                                                                                                                                                                                       |
|                        | Tinea                                  |                            | None (0); One plaque (1); 2-5 plaques (2); > 5 plaques (3)                                                                                                                                                                                                                                                                              |
|                        | Nappy Rash                             |                            | None (0); Mild erythema/ papules (1); Broken skin, severe erythema (2); Suprabacterial infection (3)                                                                                                                                                                                                                                    |
|                        | Helminths                              |                            | None (0); Larva currens (1); Larva migrans (2); Larva migrans with systemic features (3)                                                                                                                                                                                                                                                |
|                        | Trauma                                 |                            | None (0); 1-2 bruise or superficial scratch < 5cm diameter 2,(1); single bruise or deeper lacerations 5-10cm d or multiple superficial wounds in 2-10 locations (2); Bruise/ laceration >10cm d or greater than 10 discreet areas (3)                                                                                                   |
| <b>Eyes</b>            | Infection                              |                            | None (0); Discharge/ mild conjunctivitis in one eye (1); Discharge/ conjunctivitis in both eyes (2); Periorbital or orbital cellulitis (3)                                                                                                                                                                                              |
| <b>Dental</b>          | Gingivitis                             |                            | None (0); Mild erythema, swelling and bleeding of gums (1); Moderate erythema, swelling, bleeding and signs of infection (2); Severe erythema, swelling, bleeding and infection in gums (3)                                                                                                                                             |
|                        | Number of decayed teeth                |                            | None (0); 1-2 decayed teeth (1); 2-5 (2); 3 >5 (3)                                                                                                                                                                                                                                                                                      |
|                        | Mouth and mucous membranes             |                            | None (0); Angular stomatitis (1); Herpes lesions 1-2 (2) 3 or more herpes lesions or similar (3)                                                                                                                                                                                                                                        |

618
